# Supplementary material for: Effectiveness of digital health exercise interventions on muscle function and physical performance in older adults with possible, confirmed or severe sarcopenia: a protocol for a systematic review
Source: HighWire-hosted journal article supplement (doi:10.1136/bmjopen-2024-086124), 2024-10-01
Supplement: bmjopen-2024-086124supp001_data_supplement.pdf [file bmjopen-2024-086124supp001_data_supplement.pdf]

Flowchart 1 PRISMA-P flowchart of study selection process

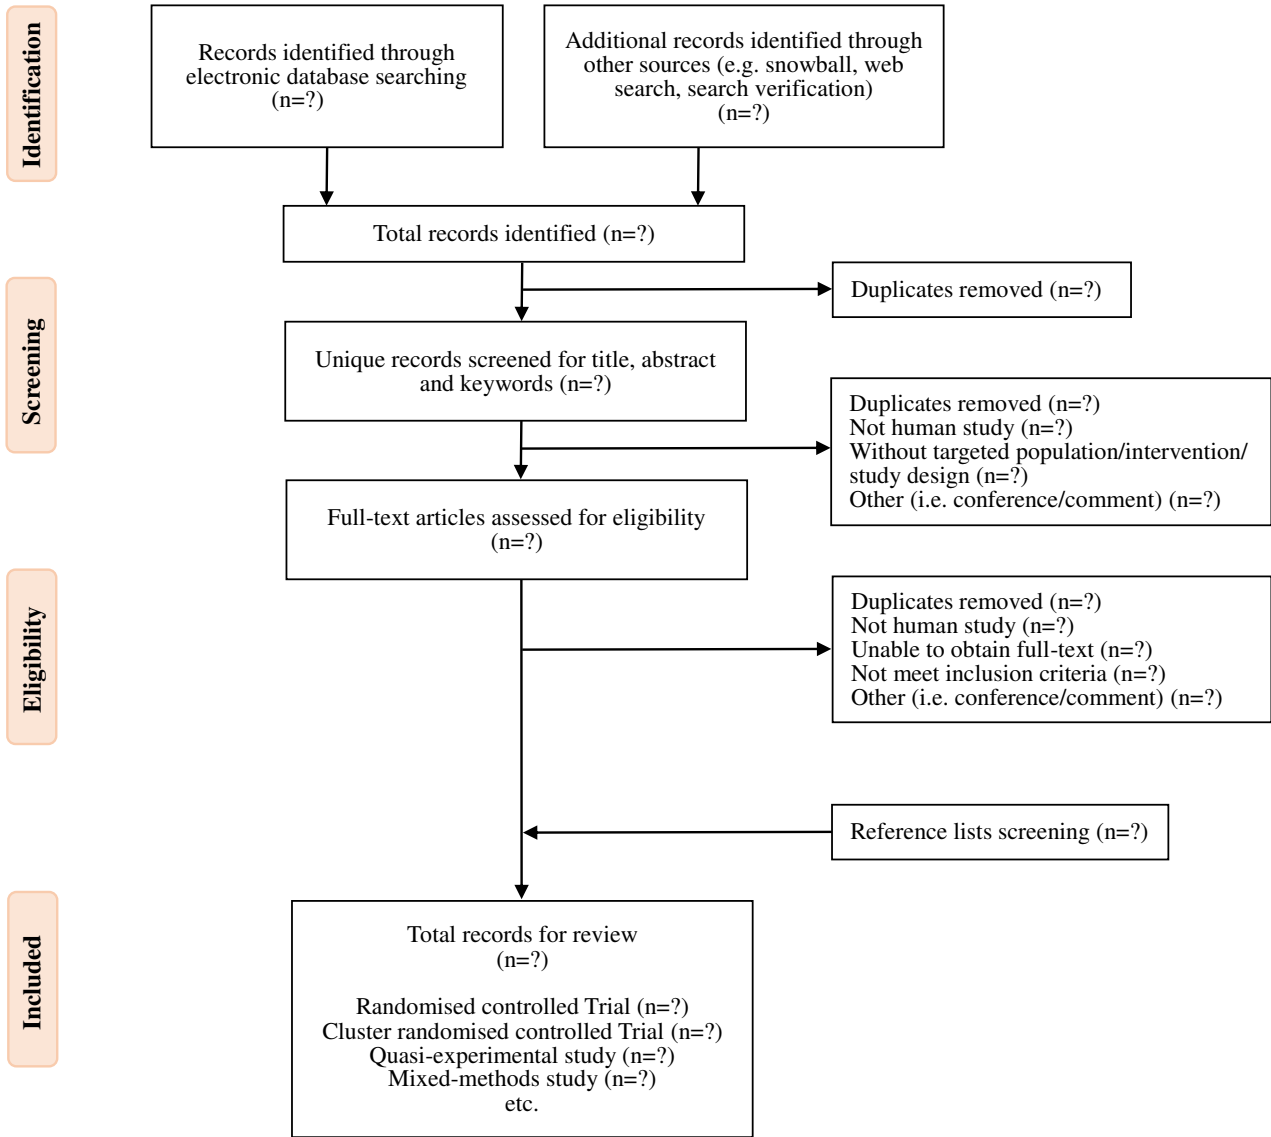

Flowchart 1 PRISMA-P flowchart of study selection process
